# Supplementary material for: The Effectiveness of Commercial Vaccination against Lawsonia intracellularis in Mitigating the Reduction in ADWG, the Increased Mortality and Fecal Shedding of the Vaccinated Pigs: A Systematic Review and Meta-Analysis
Source: MDPI journal article supplement (doi:10.3390/vetsci9100536), 2022-09-28
Supplement: s1 [file s1]

**Table S1.** Characteristics and results of the eligible studies (trials) included in the systematic review and meta-analysis examining the effectiveness of commercial vaccines against *L. intracellularis* in pigs.

| Author (year)                 | Country    | Setting          | Vaccine type (dose, route)      | Age of vaccination | Comparator                                  | Challenge type                                                                   | Production phase  | Extracted outcome                                              |                                                                |                                                   |
|-------------------------------|------------|------------------|---------------------------------|--------------------|---------------------------------------------|----------------------------------------------------------------------------------|-------------------|----------------------------------------------------------------|----------------------------------------------------------------|---------------------------------------------------|
|                               |            |                  |                                 |                    |                                             |                                                                                  |                   | ADWG (g/day); mean $\pm$ SD, sample size                       | Fecal shedding                                                 | Mortality (percentage)                            |
| Visscher et al. 2018 [43]     | Germany    | Controlled trial | Live (2ml, drench)              | 3w                 | Unvaccinated                                | Natural exposure                                                                 | Nursery           | V: 894 $\pm$ 73 (n = 9)<br>C: 821 $\pm$ 114.3 (n = 18)         | Excluded (the number of each group was not indicated)          | NR                                                |
| Kroll et al. 2004 [a] [44]    | Australia  | Controlled trial | Live (2ml, drench)              | 3w                 | unvaccinated                                | Artificial challenge (virulent LI isolate 10 <sup>7.7</sup> TCID <sub>50</sub> ) | Nursery           | V: 730 $\pm$ 160.9 (n = 15)<br>C: 660 $\pm$ 159.5 (n = 10)     | 2wpc;<br>V: 5/15,<br>C: 8/10<br>3wpc;<br>V: 0/15,<br>C: 4/10   | NR                                                |
| Kroll et al. 2004 [b] [44]    |            |                  | Live (2ml, drench) <sup>c</sup> |                    |                                             |                                                                                  |                   | V: 550 $\pm$ 160.9 (n = 40)<br>C: 490 $\pm$ 159.5 (n = 20)     | 2wpc;<br>V: 6/20,<br>C: 14/20<br>3wpc;<br>V: 4/20,<br>C: 15/20 |                                                   |
| Peiponen et al. 2018 [a] [40] | Finland    | Field trial      | Live (2ml, drench)              | 3w                 | Placebo with sham vaccination (Circo virus) | Natural exposure                                                                 | Nursery           | V: 325.1 $\pm$ 123.1 (n = 842)<br>C: 306 $\pm$ 123.3 (n = 905) | NR                                                             | V: 6.5% (64/985) <sup>a</sup><br>C: 5.6% (55/981) |
| Peiponen et al. 2018 [b] [40] |            |                  |                                 |                    |                                             |                                                                                  | Growing-finishing | V: 938.6 $\pm$ 154 (n = 800)<br>C: 907.7 $\pm$ 141 (n = 800)   |                                                                |                                                   |
| Jacobs et al. 2020 [a] [46]   | Netherland | Controlled trial | Inactivated (0.2ml. ID)         | 3w                 | unvaccinated                                | Artificial challenge (Intestinal                                                 | Nursery           | V: 956 $\pm$ 119 (n = 25)                                      | Excluded (only continuo                                        | NR                                                |

|                                       |             |             |                                      |                 |                            |                                               |                       |                                                                                    |                                                                                 |                                                        |
|---------------------------------------|-------------|-------------|--------------------------------------|-----------------|----------------------------|-----------------------------------------------|-----------------------|------------------------------------------------------------------------------------|---------------------------------------------------------------------------------|--------------------------------------------------------|
|                                       |             |             |                                      |                 |                            | mucosa<br>homogenate<br>from<br>infected pig) |                       | C: 674 ± 381<br>(n = 25)                                                           | us data<br>provided)                                                            |                                                        |
| Jacobs et<br>al. 2020<br>[b] [46]     |             |             | Live (2ml,<br>drench)                |                 |                            |                                               | Nursery               | V: 812 ± 287<br>(n = 25)<br>C: 674 ± 381<br>(n = 25)                               |                                                                                 |                                                        |
| Nathues<br>et al.<br>2008 [47]        | Germany     | Field trial | Live (2ml.<br>drinking or<br>drench) | 11w or 8-<br>9w | unvaccinated               | Natural<br>exposure                           | Growing-<br>finishing | V: 669.1 ± 35 <sup>b</sup><br>(n = 60)<br>C: 644.5 ± 24.8 <sup>b</sup><br>(n = 30) | Excluded<br>: timeline<br>following<br>the<br>challenge<br>was not<br>indicated | NR                                                     |
| McOrist<br>et al.<br>2007 [a]<br>[48] | Australia   | Field trial | Live (2ml.<br>drinking)              | 3-6w            | Placebo with<br>zinc oxide | Natural<br>exposure                           | Growing-<br>finishing | V: 830 ± 160.9<br>(n = 160)<br>C: 770 ± 108.7<br>(n = 160)                         | NR                                                                              | Excluded:<br>no death<br>was caused<br>by PPE          |
| McOrist<br>et al.<br>2007 [b]<br>[48] |             |             |                                      |                 |                            |                                               |                       | V: 790 ± 160.9<br>(n = 378)<br>C: 760 ± 108.7<br>(n = 399)                         |                                                                                 | V: 0%<br>(0/378) <sup>h</sup><br>C: 1.2%<br>(5/399)    |
| McOrist<br>et al.<br>2007 [c]<br>[48] |             |             |                                      |                 |                            |                                               |                       | V: 850 ± 160.9<br>(n = 1076)<br>C: 700 ± 159.5<br>(n = 2139)                       |                                                                                 | V: 0%<br>(0/1076)<br>C: 1.5% <sup>c</sup><br>(32/2139) |
| Weibel et<br>al. 2012<br>[7]          | Switzerland | Field trial | Live (2ml,<br>drench)                | 3w              | Placebo with<br>adjuvant   | Natural<br>exposure                           | Growing-<br>finishing | V: 774 ± 106<br>(n = 292)<br>C: 751 ± 108.7<br>(n = 160)                           | NR                                                                              | V: 5.3%<br>(17/318)<br>C: 8.3%<br>(27/327)             |
| Caspari<br>et al.<br>2009 [6]         | Switzerland | Field trial | Live (2ml,<br>drench)                | 3w              | Placebo with<br>0.9%NaCl   | Natural<br>exposure                           | Growing-<br>finishing | V: 795 ± 106<br>(n = 256)<br>C: 777 ± 108.7<br>(n = 279)                           | NR                                                                              | NR                                                     |
| Hardge et<br>al. 2004<br>[a] [50]     | Germany     | Field trial | Live (2ml,<br>drench)                | 7w              | Unvaccinated               | Natural<br>exposure                           | Growing-<br>finishing | V: 702 ± 106<br>(n = 278)<br>C: 674 ± 108.7<br>(n = 278)                           | NR                                                                              | V: 4.98%<br>(14/278)<br>C: 4.68%<br>(13/278)           |

|                             |            |                  |                       |         |                                                                                                     |                                                                       |                     |                                                                               |                                          |                                                               |
|-----------------------------|------------|------------------|-----------------------|---------|-----------------------------------------------------------------------------------------------------|-----------------------------------------------------------------------|---------------------|-------------------------------------------------------------------------------|------------------------------------------|---------------------------------------------------------------|
| Hardge et al. 2004 [b] [50] |            |                  |                       | 3w      |                                                                                                     |                                                                       |                     | V: 692 ± 106 (n = 273)<br>C: 682 ± 108.7 (n = 271)                            |                                          | Excluded (mortality partially caused by respiratory syndrome) |
| Park et al. 2013 [a] [38]   | Korea      | Field trial      | Live (2ml, PO)        | 32 days | Placebo with sham vaccinations (PRRS, swine erysipelas, Japanese encephalitis, hog cholera vaccine) | Natural exposure                                                      | Nursery             | V: 509 ± 86 (n = 323)<br>C: 500 ± 90 (n = 315)                                | NR                                       | Excluded (total death number was not provided)                |
| Park et al. 2013 [b] [38]   |            |                  |                       |         |                                                                                                     |                                                                       | Growing-finishing   | V: 736.8 ± 155.3 (n = 595)<br>C: 716.8 ± 173.5 (n = 575)                      |                                          |                                                               |
| Deitmer et al. 2008[39]     | Germany    | Field trial      | Live (2ml, PO)        | 32 days | Placebo with Tylosin                                                                                | Natural exposure                                                      | Nursery             | V: 421 ± 160.9 (n = 470)<br>C: 404 ± 159.5 (n = 421)                          | NR                                       | NR                                                            |
| Bornhorn et al. 2007 [41]   | Germany    | Field trial      | Live (2ml, PO)        | 3w      | Placebo with Tylosin                                                                                | Natural exposure                                                      | Growing-finishing   | V: 833 ± 41.7 <sup>d</sup> (n = 2208)<br>C: 808 ± 42.7 <sup>d</sup> (n = 560) | NR                                       | NR                                                            |
| Thaker et al. 2006 [42]     | Hungary    | Field trial      | Live (2ml, drench)    | 10w     | Unvaccinated                                                                                        | Natural exposure                                                      | Growing-finishing   | V: 799 ± 49 (n = 3810)<br>C: 650 ± 92 (n = 3809)                              | NR                                       | V: 2% (80/3810)<br>C: 6.9% (266/3809)                         |
| Almond et al. 2006 [3]      | Hungary    | Field trial      | Live (2ml, drinking)  | 9-11w   | Unvaccinated                                                                                        | Natural exposure                                                      | Growing - Finishing | V: 780 ± 45 (n = 4112)<br>C: 660 ± 71 (n = 4188)                              | NR                                       | V: 0.2% (8/4112)<br>C: 14.9% (624/4188)                       |
| Jacobs et al. 2019 [a] [49] | Netherland | Controlled trial | Inactivated (2ml. IM) | 4w      | Unvaccinated                                                                                        | Artificial challenge (Intestinal mucosa homogenate from infected pig) | Nursery             | V: 935 ± 306 (n = 25)<br>C: 550 ± 460 (n = 25)                                | Excluded (continuous data only provided) | NR                                                            |
| Jacobs et al. 2019 [b] [49] |            |                  |                       |         |                                                                                                     |                                                                       | Growing - Finishing | V: 956 ± 119 (n = 25)                                                         |                                          |                                                               |

|                             |         |                  |                    |      |                                              |                                                            |                     |                                                         |                                                                                                   |                                           |
|-----------------------------|---------|------------------|--------------------|------|----------------------------------------------|------------------------------------------------------------|---------------------|---------------------------------------------------------|---------------------------------------------------------------------------------------------------|-------------------------------------------|
|                             |         |                  |                    |      |                                              |                                                            |                     | C: 674 ± 381<br>(n = 25)                                |                                                                                                   |                                           |
| Jacobs et al. 2019 [c] [49] |         |                  | Live (2ml, drench) |      |                                              |                                                            | Nursery             | V: -229 ± 1301<br>(n = 25)<br>C: -655 ± 723<br>(n = 25) |                                                                                                   |                                           |
| Jacobs et al. 2019 [d] [49] |         |                  |                    |      |                                              |                                                            | Growing - Finishing | V: 655 ± 385<br>(n = 25)<br>C: 550 ± 460<br>(n = 25)    |                                                                                                   |                                           |
| Jacobs et al. 2019 [e] [49] |         | Field trial      | Inactivated        | 12w  | Placebo with sham-vaccination (PRRS vaccine) | Natural exposure                                           | Growing - Finishing | Excluded (control group came from historical data)      | NR                                                                                                | V: 0%<br>(0/1435)<br>C: 0.7%<br>(11/1441) |
| Riber et al. 2015[51]       | Denmark | Controlled trial | Live (2ml, drench) | 5-6w | Placebo with antibiotics (tiamulin)          | Artificial challenge (10 <sup>10</sup> virulent LI strain) | NR                  | Excluded (only qualitative analysis provided)           | 6dpc;<br>V: 6/8,<br>C:6/7<br>14dpc;<br>V:8/8,<br>C:7/7<br>18dpc;<br><sup>e</sup> V: 5/5,<br>C:7/7 | NR                                        |

Abbreviations: NR, not reported; wpc, week post-challenge; PO, per oral; CI, confidence interval

<sup>a</sup> The number of death estimated based on the percentage and case number

<sup>b</sup> Data extracted from the graph to include both mean and SD value

<sup>c</sup> Mortality rate caused by PPE in the control group was estimated and ranged between 1.5%-11.3%. For data analysis, a 1.5% mortality rate was selected.

<sup>d</sup> The pooled data were obtained from eight farms.

<sup>e</sup> The number of samples is not consistent in the vaccinated group, since some data were missing in the original study.

## References

- Almond, P.K.; Bilkei, G. Effects of Oral Vaccination against *Lawsonia Intracellularis* on Growing-Finishing Pig's Performance in a Pig Production Unit with Endemic Porcine Proliferative Enteropathy (PPE). Dtsch. Tierarztl. Wochenschr. 2006, 113, 232–235
- Caspari, K.; Kummerlen, D.; Voets, H.; Eichin, E.; Zeeh, H.; Zimmermann, W. Field study about the use of Enterisol Ileitis in a swine herd in Switzerland. Schweiz. Arch.

Tierheilkd. 2009, 151, 31–32. <https://doi.org/10.1024/0036-7281.151.1.31>

7. Weibel, H.; Sydlar, T.; Brugnera, E.; Voets, H.; Grosse Liesner, B.; Sidler, X. Efficacy of Simultaneous Vaccination with En-terisol(R) Ileitis and Ingelvac(R) CircoFLEX<sup>TM</sup> in a Swiss Breeding Farm. *Schweiz. Arch. Tierheilkd.* 2012, 154, 445–450. <https://doi.org/10.1024/0036-7281/a000381>.

38. Park, S.; Lee, J.-B.; Kim, K.-J.; Oh, Y.-S.; Kim, M.-O.; Oh, Y.-R.; Hwang, M.-A.; Lee, J.-A.; Lee, S.-W. Efficacy of a Commercial Live Attenuated *Lawsonia Intracellularis* Vaccine in a Large Scale Field Trial in Korea. *Clin. Exp. Vaccine Res.* 2013, 2, 135–139. <https://doi.org/10.7774/cevr.2013.2.2.135>.

39. Deitmer, R.; Bubikat, A.; Keller, C.; Adam, M.; Voets, H. Embedded Ileitis Vaccination or Antibiotic Treatment—a Comparison of Efficacy and Economic Impact during the Nursery Period. *Prakt. Tierarzt-Hann.* 2008, 1, 142–151.

40. Peiponen, K.S.; Tirkkonen, B.T.; Junnila, J.J.T.; Heinonen, M.L. Effect of a Live Attenuated Vaccine against *Lawsonia Intracellularis* in Weaned and Finishing Pig Settings in Finland. *Acta Vet. Scand.* 2018, 60, 18. <https://doi.org/10.1186/s13028-018-0374-8>.

41. Bornhorn, R. Efficacy and Economical Impact of Oral Vaccination of Partially Infected Piglets with Enterisol (R) Ileitis. *Prakt. Tierarzt* 2007, 88, 172–178.

42. Thaker, M.Y.C.; Bilkei, G. Comparison of the Effects of Oral Vaccination and Different Dietary Antibiotic Prophylactic Treatment against *Lawsonia Intracellularis* Associated Losses in a Fattening Pig Production Unit with High Prevalence of Porcine Proliferative Enteropathy (PPE). *Tierarztl. Umsch.* 2006, 61, 372–376.

43. Visscher, C.; Kruse, A.; Sander, S.; Keller, C.; Mischok, J.; Tabeling, R.; Henne, H.; Deitmer, R.; Kamphues, J. Experimental Studies on Effects of Diet on *Lawsonia Intracellularis* Infections in Fattening Boars in a Natural Infection Model. *Acta Vet. Scand.* 2018, 60, 22. <https://doi.org/10.1186/s13028-018-0378-4>.

44. Kroll, J.J.; Roof, M.B.; McOrist, S. Evaluation of Protective Immunity in Pigs Following Oral Administration of an Avirulent Live Vaccine of *Lawsonia Intracellularis*. *Am. J. Vet. Res.* 2004, 65, 559–565. <https://doi.org/10.2460/ajvr.2004.65.559>.

46. Jacobs, A.A.C.; Harks, F.; Pauwels, R.; Cao, Q.; Holtslag, H.; Pel, S.; Segers, R. Efficacy of a Novel Intradermal *Lawsonia Intracellularis* Vaccine in Pigs against Experimental Infection and under Field Conditions. *Porc. Health Manag.* 2020, 6, 25. <https://doi.org/10.1186/s40813-020-00164-0>.

47. Nathues, H.; Grosse Beilage, E. Diagnosis of *Lawsonia Intracellularis* Infection in Pigs after Vaccination or Antimicrobial Treatment. *Dtsch. Tierarztl. Wochenschr.* 2008, 115, 404–409.

48. McOrist, S.; Smits, R.J. Field Evaluation of an Oral Attenuated *Lawsonia Intracellularis* Vaccine for Porcine Proliferative Enteropathy (Ileitis). *Vet. Rec.* 2007, 161, 26–28. <https://doi.org/10.1136/vr.161.1.26>.

49. Jacobs, A.A.C.; Harks, F.; Hazenberg, L.; Hoeijmakers, M.J.H.; Nell, T.; Pel, S.; Segers, R.P.A.M. Efficacy of a Novel Inactivated *Lawsonia Intracellularis* Vaccine in Pigs against Experimental Infection and under Field Conditions. *Vaccine* 2019, 37, 2149–2157. <https://doi.org/10.1016/j.vaccine.2019.02.067>.

50. Grunert, H.; Elbers, K.; Langbein, U.; Keller, C.; Bleier, T.; Pohlenz, J.; Ohlinger, V.F.; Schroeder, B. Prevention of Porcine Proliferative Enteropathy (PPE) by Vaccination—Efficacy and Economics in European Farms. *Pig J.* 2004, 54, 17–34.

51. Riber, U.; Heegaard, P.M.H.; Cordes, H.; Ståhl, M.; Jensen, T.K.; Jungersen, G. Vaccination of Pigs with Attenuated *Lawsonia Intracellularis* Induced Acute Phase Protein Responses and Primed Cell-Mediated Immunity without Reduction in Bacterial Shedding after Challenge. *Vaccine* 2015, 33, 156–162. <https://doi.org/10.1016/j.vaccine.2014.10.084>.
